# Supplementary material for: Mesoscale ordering in binary aqueous solvents induced by ion size asymmetry
Source: Royal Society of Chemistry journal article supplement (doi:10.1039/c6sm00580b), 2016-01-01
Supplement: c6sm00580b1.pdf [file c6sm00580b1.pdf]

## Electronic Supplementary Information: Mesoscale order in binary aqueous solvents induced by ion size asymmetry

Monika Witala, Sebastian Lages, Kim Nygård

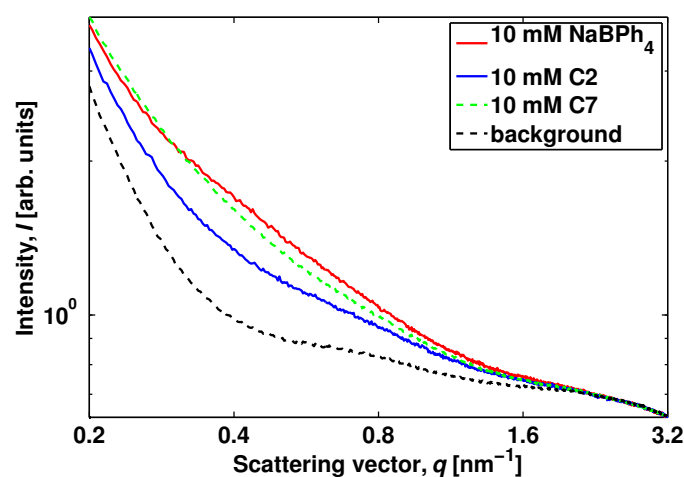

Figure S1: Measured SAXS intensity as a function of scattering vector. Data are shown for the mixture containing 10 mM of either tetraethylammonium bromide (C2, blue solid line), tetraheptylammonium bromide (C7, green dashed line), or sodium tetrphenylborate ( $\text{NaBPh}_4$ , red solid line). The background profile (dashed black line) is obtained as a linear combination of separately measured SAXS intensity from the solvent components, water and 2,6-DMP, using the 2,6-DMP volume fraction  $\phi = 0.3$ . All data were collected at 303 K.
